# Supplementary material for: Osmotrophic glucose and leucine assimilation and its impact on EPA and DHA content in algae
Source: PeerJ. 2020 Jan 3;8:e8363. doi: 10.7717/peerj.8363 (PMC6944096; doi:10.7717/peerj.8363)
Supplement: Supplemental Information 1 — The carbon and nitrogen drift and drift percentage values for the studied seven algal strains. [file peerj-08-8363-s001.xlsx]

## Sheet: short-term labeling
			carbon	carbon	nitrogen	nitrogen
			DRIFT	DRIFT %	DRIFT	DRIFT %
	Cryptomonas sp. 336	control	-24.1553	48.136	3.38539	7.58495
		glucose	-23.0251	53.761	3.78064	8.22901
		leucine	-24.3954	44.7557	4.6845	8.72317
		glucose + leucine	-23.0973	50.4432	4.52569	8.20153
	Chlamydomonas	control	-21.2315	53.5797	4.00614	8.42173
		glucose	-20.9893	54.7262	4.30014	8.44686
		leucine	-21.1376	50.8282	4.30664	8.29819
		glucose + leucine	-21.5291	51.0585	4.36394	8.67043
	Euglena	control	-19.0246	46.2426	3.88239	5.72481
		glucose	-19.7395	47.9301	3.94575	6.30079
		leucine	-19.2811	47.0681	3.96794	5.6877
		glucose + leucine	-18.5721	49.8707	4.03664	5.63969
	M. kalinae	control	-22.6318	46.7139	3.51044	7.56789
		glucose	-22.4119	48.4278	3.46769	7.71663
		leucine	-23.1406	48.2971	3.93069	7.83699
		glucose + leucine	-22.0417	50.2969	4.00289	7.51332
	C. ozolinii	control	-23.5569	49.5061	4.56719	8.99483
		glucose	-21.1937	51.5571	4.28489	8.77737
		leucine	-23.3029	47.2535	6.57169	8.97496
		glucose + leucine	-21.342	46.7879	6.49894	9.14243
	Peridium sp.	control	-15.8343	50.3132	2.96044	4.93019
		glucose	-15.8066	46.1998	3.80319	4.75376
		leucine	-15.9174	50.3971	3.30419	4.78574
		glucose + leucine	-15.5185	52.3466	3.25814	3.12325
	Selenastrum sp.	control	-21.5634	58.584	1.02189	7.34907
		glucose	-16.2713	55.367	0.850889	7.32708
		leucine	-21.5705	53.3358	1.87814	7.23236
		glucose + leucine	-16.8507	48.1636	2.06544	6.75321
