# Supplementary material for: Osmotrophic glucose and leucine assimilation and its impact on EPA and DHA content in algae
Source: PeerJ. 2020 Jan 3;8:e8363. doi: 10.7717/peerj.8363 (PMC6944096; doi:10.7717/peerj.8363)
Supplement: Supplemental Information 2 — The concentrations of the 16:0, ALA, SDA, EPA, DHA and total FAs in the controls and in different glucose (i.e., 0.5 mg L−1, 2 mg L−1, 5 mg L−1) and leucine (20 mg L−1,100 mg L−1,400 mg L−1) concentrations. [file peerj-08-8363-s002.xlsx]

## Sheet: long-term fatty acids
	treatment	Control	Glu	Glu	Glu	Glu	Glu	Glu	Leu	Leu	Leu	Leu	Leu	Leu		Control	Glu	Glu	Leu	Glu	Glu	Glu	Leu	Leu	Leu	Leu	Leu	Leu		Control	Glu	Gu	Glu	Glu	Glu	Glu	Leu	Leu	Leu	Leu	Leu	Leu
	concentration	-	0.5 A	0.5 B	2 A	2 B	5 B	5 C	20 A	20 B	100 A	100 B	400 A	400 B		-	0.5 A	0.5 B	2 A	2 B	5 A	5 B	20 A	20 B	100 A	100 B	400 A	400 B		-	0.5 A	0.5 B	2 A	2 B	5 A	5 B	20 A	20 B	100 A	100 B	400 A	400 B
	strain	C. ozolinii	C. ozolinii	C. ozolinii	C. ozolinii	C. ozolinii	C. ozolinii	C. ozolinii	C. ozolinii	C. ozolinii	C. ozolinii	C. ozolinii	C. ozolinii	C. ozolinii		Cryptomonas sp. 336	Cryptomonas sp. 337	Cryptomonas sp. 338	Cryptomonas sp. 339	Cryptomonas sp. 340	Cryptomonas sp. 341	Cryptomonas sp. 342	Cryptomonas sp. 343	Cryptomonas sp. 344	Cryptomonas sp. 345	Cryptomonas sp. 346	Cryptomonas sp. 347	Cryptomonas sp. 348		M. kalinae	M. kalinae	M. kalinae	M. kalinae	M. kalinae	M. kalinae	M. kalinae	M. kalinae	M. kalinae	M. kalinae	M. kalinae	M. kalinae	M. kalinae
fatty acid
16:0		4.2556	4.17273	6.24093	5.87969	3.7258	4.43576	4.77289	5.9879	4.56572	4.60681	4.30376	4.88052	5.06637		7.79338	8.90081	6.60526	13.8013	13.3026	8.05776	9.04767	9.5886	11.3104	9.05295	6.20604	10.0083	10.425		8.21799	4.19357	3.99068	8.9819	6.85369	3.64814	6.36064	7.40579	8.77386	3.94858	4.05677	5.47383	8.10502
ALA		8.05871	7.58788	12.652	12.4406	6.57731	8.41437	9.54928	12.3666	9.34128	9.58194	8.84737	6.55644	10.4956		21.6502	15.1224	18.3915	23.3836	22.929	21.1595	16.621	19.5022	20.7337	16.2569	17.9725	18.1484	17.825		7.26404	9.625	3.77656	8.3616	8.32513	1.42012	8.10744	10.1822	11.6967	4.79637	4.34701	8.83467	7.22789
SDA		8.53041	8.69894	14.6207	15.268	6.57193	10.5461	11.6079	14.803	12.4213	12.35	10.5844	7.38326	12.6451		11.4761	14.0043	15.89	18.9726	15.2318	17.8171	12.4457	19.2061	22.3138	10.4945	16.1185	23.8885	22.1327		10.3239	12.7664	3.92157	8.05576	10.0424	1.68581	10.7213	12.0823	13.8043	5.88046	5.28423	13.4354	7.86162
EPA		7.0045	6.93708	10.9013	11.6824	5.25481	7.84771	10.3656	11.2037	11.0277	10.8354	8.57039	6.40399	9.94125		13.0515	11.5182	12.2365	15.9586	11.3401	14.256	10.416	13.1405	16.6783	8.98538	13.2599	17.1379	16.5525		0.300865	0.260221	0.10292	0.285646	0.321164	0.0617278	0.290048	0.337598	0.361152	0.156006	0.135774	0.27525	0.25418
DHA		1.64978	1.73084	2.69634	2.90402	1.19227	1.88469	2.81989	2.86355	2.82209	2.95574	2.17876	1.49056	2.53541		1.38681	1.89162	2.1416	2.52227	1.69341	2.27703	1.41173	2.57045	3.05245	1.30352	2.17267	3.48739	3.21371		0.773557	0.99907	0.326065	0.728796	0.880259	0.22768	0.882524	0.970436	1.10095	0.413077	0.367562	0.8805	0.580583
Total Fas		35.9436	34.9552	35.4494	57.5283	32.1324	40.3371	33.8144	57.024	33.1316	49.7851	36.2223	34.8551	30.9179		60.7472	64.4719	41.2055	95.724	51.555	81.5263	59.4883	79.1481	56.1817	61.476	50.3906	87.2536	50.354		88.7874	64.1191	76.4532	87.4798	60.7352	23.3431	44.2743	83.4922	44.0939	45.8563	45.4005	72.5432	40.9736
